# Supplementary material
Source: PubMed Central journal article supplement (PMC3591855)
Supplement: mmc1.pdf [file mmc1.pdf]

## Supplemental Data

### An African American Paternal Lineage

### Adds an Extremely Ancient Root to the

### Human Y Chromosome Phylogenetic Tree

Fernando L. Mendez, Thomas Krahn, Bonnie Schrack, Astrid-Maria Krahn, Krishna R. Veeramah, August E. Woerner, Forka Leypey Mathew Fomine, Neil Bradman, Mark G. Thomas, Tatiana M. Karafet, and Michael F. Hammer

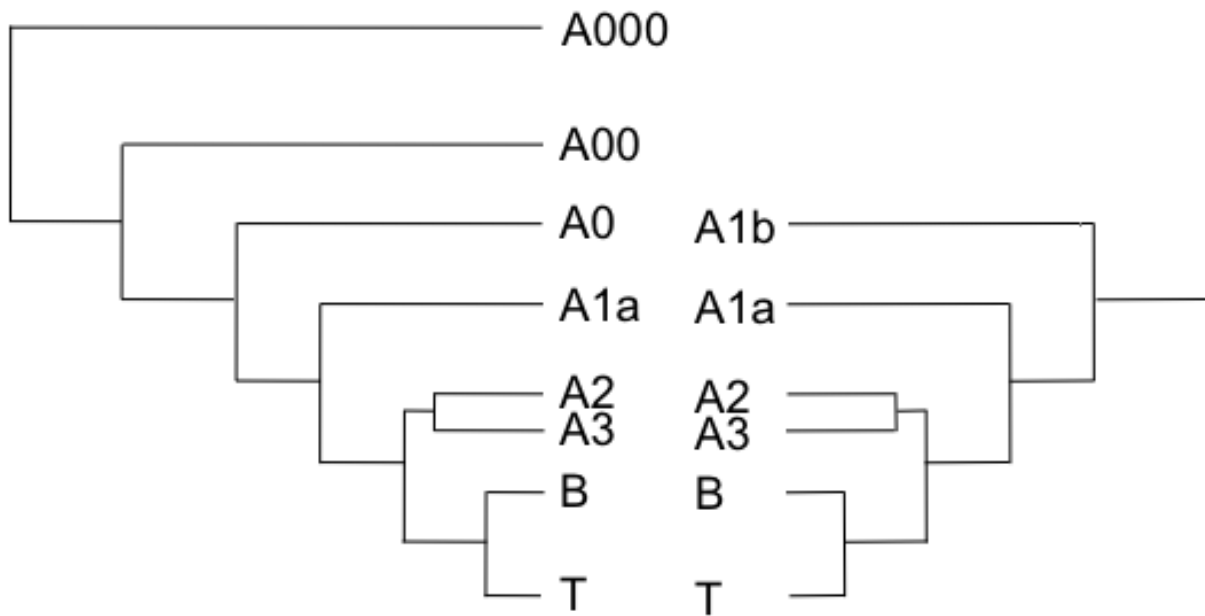

**Figure S1. Proposed Nomenclature System for Newly Discovered Deep Branches (Those Branches that Carry the Ancestral State at All Y-SNPs that Were Previously Known)**

On the left is shown the proposed nomenclature (see text), and on the right is shown the nomenclature of Cruciani et al.<sup>1</sup>. We have renamed the basal branch in Cruciani et al.<sup>1</sup> as A0 (previously A1b) and refer to the presently reported lineage as A00. For deep branches discovered in the future, we suggest continuing the nomenclature A000, and so on. If multiple deep branches are found, then a possible short hand version could be used, such as A(0)n.

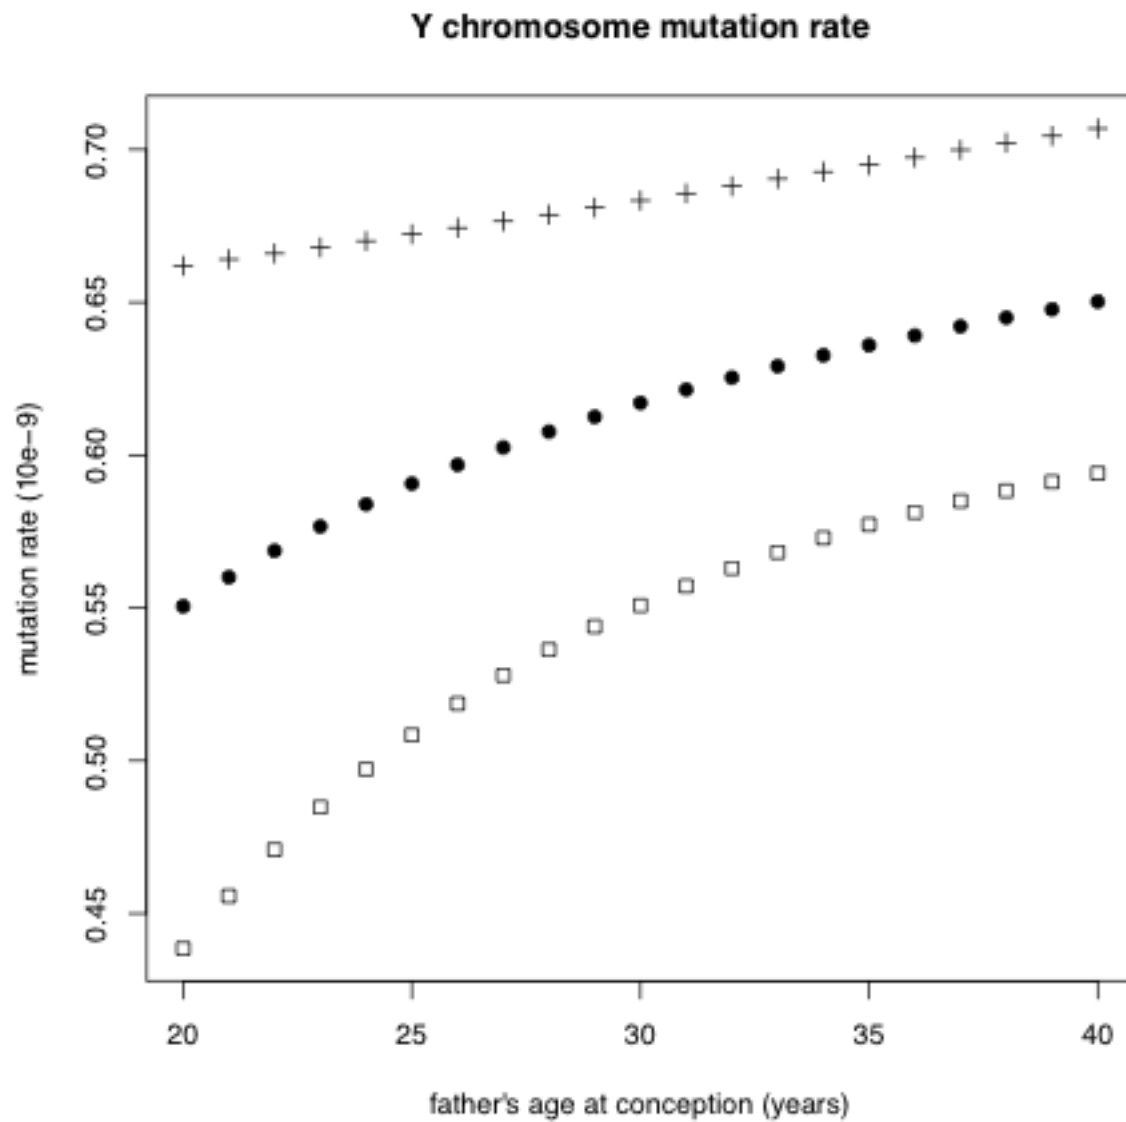

**Figure S2. Estimates for the X-Degenerate Y Chromosome Mutation Rate per Year per Base, as Inferred from Mutation Rates Estimated in Pedigrees**

For each age of reproduction, the lower bound (open squares '□'), median (solid circles '●') and upper bound (plus signs '+') are indicated.

**Table S1. Mutations in A00 and A0 Chromosomes**

| Position Start (hg18) | Position End (hg18) | Branch | Name  | Mutation | Notes                                                          |
|-----------------------|---------------------|--------|-------|----------|----------------------------------------------------------------|
| 2716961               | 2716961             | A00    | L1234 | G->A     | + in Mbo                                                       |
| 2838396               | 2838396             | A00    | L1122 | C->T     | + in Mbo                                                       |
| 2886312               | 2886312             | A00    | L1086 | A->T     | + in Mbo                                                       |
| 2935499               | 2935499             | A00    | L1087 | G->T     | + in Mbo                                                       |
| 2947279               | 2947279             | A00    | L1088 | C->G     | + in Mbo                                                       |
| 2947280               | 2947280             | A0-T   | L1089 | G->C     |                                                                |
| 6895384               | 6895384             | A00    | L1096 | G->A     | + in Mbo                                                       |
| 6903217               | 6903217             | A00    | L1097 | C->T     | + in Mbo                                                       |
| 6911661               | 6911661             | A00    | L1100 | C->T     | - in Mbo                                                       |
| 6936455               | 6936455             | A00    | L1102 | A->G     | + in Mbo                                                       |
| 6937771               | 6937771             | A00    | AF6   | A->G     | + in Mbo                                                       |
| 6939913               | 6939913             | A00    | L1103 | C->T     | + in Mbo                                                       |
| 6955758               | 6955758             | A00    | L1104 | C->T     | + in Mbo                                                       |
| 6991670               | 6991670             | A0     | L1073 | T->C     |                                                                |
| 6991719               | 6991719             | A00    | AF7   | A->G     | + in Mbo                                                       |
| 7121505               | 7121505             | A0     | L984  | G->T     |                                                                |
| 12511289              | 12511289            | A00    | L990  | A->G     |                                                                |
| 12635645              | 12635645            | A0     | L1075 | C->T     |                                                                |
| 12636859              | 12636859            | A00    | AF8   | A->G     | + in Mbo                                                       |
| 12741291              | 12741291            | A0-T   | L1118 | T->C     |                                                                |
| 12796426              | 12796426            | A00    | L1117 | A->T     | + in Mbo                                                       |
| 12917922              | 12917922            | A00    | L1119 | G->A     | + in Mbo                                                       |
| 12979380              | 12979380            | A0     | L993  | A->C     |                                                                |
| 13006456              | 13006456            | A0-T   | L1121 | G->A     |                                                                |
| 13007067              | 13007067            | A0     | L991  | C->A     |                                                                |
| 13414541              | 13414541            | A0     | L995  | T->C     |                                                                |
| 13533434              | 13533434            | A0     | L996  | G->A     |                                                                |
| 13935738              | 13935738            | A0-T   | L1124 | T->C     |                                                                |
| 13946200              | 13946200            | A0     | L998  | T->G     |                                                                |
| 13947281              | 13947281            | A0     | L999  | C->T     |                                                                |
| 13977162              | 13977162            | A0-T   | L1125 | A->G     |                                                                |
| 14084737              | 14084737            | A0     | L1000 | C->A     |                                                                |
| 14114397              | 14114397            | A00    | L1126 | A->G     | + in Mbo                                                       |
| 14431477              | 14431477            | A0     | L1076 | G->A     |                                                                |
| 14702402              | 14702402            | A00    | AF9   | C->T     | + in Mbo                                                       |
| 14791204              | 14791204            | A0-T   | L1127 | A->G     |                                                                |
| 14838487              | 14838487            | A00    |       | G->A     |                                                                |
| 14860990              | 14860990            | A00    | AF10  | G->A     | + in Mbo                                                       |
| 14901994              | 14901994            | A0     | L1001 | G->T     |                                                                |
| 14902035              | 14902035            | A0-T   | L1273 | T->C     |                                                                |
| 15106240              | 15106240            | A0-T   | L1129 | T->C     | used gorilla to infer ancestral state (6 bp deletion in chimp) |
| 15170404              | 15170404            | A0-T   | L1130 | T->G     |                                                                |
| 15208490              | 15208490            | A00    | L1131 | G->A     | + in Mbo                                                       |
| 15228205              | 15228205            | A0-T   | L1132 | A->G     |                                                                |
| 15695829              | 15695829            | A00    | L1133 | C->T     | + in Mbo                                                       |
| 15976206              | 15976206            | A0     | L1077 | G->T     |                                                                |

**Table S1. Continued**

| Position Start (hg18) | Position End (hg18) | Branch | Name  | Mutation | Notes    |
|-----------------------|---------------------|--------|-------|----------|----------|
| 16019965              | 16019965            | A00    | L1134 | G->T     | + in Mbo |
| 16283616              | 16283616            | A0     | L1006 | A->T     |          |
| 16627408              | 16627408            | A0     | L1008 | C->A     |          |
| 16656697              | 16656697            | A0-T   | L1135 | C->A     |          |
| 17374735              | 17374736            | A0     | L1078 | CC->AT   |          |
| 17423680              | 17423680            | A0-T   | L1136 | A->G     |          |
| 17556485              | 17556485            | A0-T   | L1137 | C->T     |          |
| 17558114              | 17558114            | A00    | L1138 | G->T     | + in Mbo |
| 17587144              | 17587144            | A00    | L1139 | A->C     | + in Mbo |
| 17885711              | 17885711            | A00    | L1140 | G->C     | + in Mbo |
| 19502698              | 19502698            | A00    | L1141 | C->T     | + in Mbo |
| 19502834              | 19502834            | A0     | L1010 | T->C     |          |
| 19747950              | 19747950            | A0-T   | L1142 | C->T     |          |
| 19748116              | 19748116            | A0     | L1011 | C->A     |          |
| 19940817              | 19940817            | A0     | L1012 | C->T     |          |
| 19950468              | 19950468            | A00    | AF13  | G->A     | + in Mbo |
| 19966682              | 19966682            | A00    |       | G->T     |          |
| 20052733              | 20052733            | A0-T   | L1143 | A->G     |          |
| 20081484              | 20081484            | A0     | L1055 | G->A     |          |
| 20166014              | 20166014            | A0     | L896  | A->T     |          |
| 20176694              | 20176694            | A00    | L1144 | C->T     | + in Mbo |
| 20199048              | 20199048            | A00    | L1146 | G->A     | + in Mbo |
| 20199178              | 20199178            | A0-T   | L1145 | C->T     |          |
| 20211928              | 20211928            | A00    | L1147 | A->T     | + in Mbo |
| 20328703              | 20328703            | A00    | L1148 | C->T     | + in Mbo |
| 20329216              | 20329216            | A00    | L1149 | C->T     | - in Mbo |
| 20349061              | 20349061            | A0     | L1015 | G->A     |          |
| 20352688              | 20352688            | A0     | L1080 | T->C     |          |
| 20355437              | 20355437            | A0     | L1016 | T->C     |          |
| 20363359              | 20363359            | A0-T   | L1150 | A->G     |          |
| 20376381              | 20376381            | A00    | L1151 | G->T     | + in Mbo |
| 20383724              | 20383724            | A0     | L1017 | C->G     |          |
| 20385338              | 20385338            | A00    | L1152 | C->T     | + in Mbo |
| 20638051              | 20638051            | A0     | L1070 | G->C     |          |
| 20650519              | 20650519            | A00    | L1154 | A->G     | + in Mbo |
| 20650654              | 20650654            | A0-T   | L1155 | G->C     |          |
| 21132180              | 21132180            | A0     | L1083 | G->T     |          |
| 21378369              | 21378369            | A00    | L1156 | C->G     | + in Mbo |
| 21386451              | 21386451            | A00    | L1157 | G->A     | + in Mbo |
| 21419449              | 21419449            | A00    | L1158 | G->T     |          |
| 21431054              | 21431054            | A00    | L1159 | A->T     | + in Mbo |
| 21527318              | 21527318            | A00    | L1160 | A->G     | + in Mbo |





**Table S2. Continued**

| Y-STR        | Sample |        |        |        |        |        |        |        |        |        |        |                  |
|--------------|--------|--------|--------|--------|--------|--------|--------|--------|--------|--------|--------|------------------|
|              | Mbo052 | Mbo159 | Mbo160 | Mbo161 | Mbo170 | Mbo173 | Mbo174 | Mbo179 | Mbo183 | Mbo186 | Mbo199 | African American |
| DYS715       | 26     | 26     | 26     | 26     | 26     | 26     | 26     | 26     | 26     | 26     | 26     | 26               |
| DYS716       | 28     | 28     | 28     | -1     | 28     | 28     | 28     | -1     | 28     | 28     | 28     | 28               |
| DYS717       | 19     | 19     | 19     | 19     | 19     | 19     | 19     | -1     | 19     | 19     | 19     | 19               |
| DYS726       | 15     | 15     | 15     | 15     | 15     | 15     | 15     | -1     | 15     | 15     | 15     | 15               |
| Y-GATA-A10   | 12     | 12     | 12     | 11     | 12     | 12     | 12     | 12     | 12     | 12     | 12     | 12               |
| Y-GATA-H4    | 10     | 10     | 10     | 10     | 10     | 10     | 10     | 10     | 10     | 10     | 10     | 10               |
| Y-GGAAT-1B07 | 10     | 10     | 10     | 10     | 10     | 10     | 10     | 10     | 10     | 10     | 10     | 10               |

<sup>a</sup>: From a pool of 102 STRs, multiple copy STRs with undistinguishable copies (CDY, DYF395S1, DYS385, DYS413, DYS459, DYS464, and YCAII) were removed.

Data from three individuals lacking information for 8 or more STRs were removed from further analyses.

<sup>b</sup>: No data is indicated with -1

<sup>c</sup>: all listed samples have a .2 micro allele

<sup>d</sup>: all listed samples have a .3 micro allele

<sup>e</sup>: Mbo have a .2 micro allele and the African American individual has a .1 micro allele

<sup>f</sup>: all listed samples have a .3 micro allele

## Reference

1. Cruciani, F., Trombetta, B., Massaia, A., Destro-Bisol, G., Sellitto, D., and Scozzari, R. (2011). A revised root for the human Y chromosomal phylogenetic tree: the origin of patrilineal diversity in Africa. *Am J Hum Genet* 88, 814-818.
